# Supplementary material for: Association between systemic oxidative stress and visual field damage in open-angle glaucoma
Source: PubMed Central journal article supplement (PMC4863173; doi:10.1038/srep25792), 2016-05-11
Supplement: srep25792-s1.pdf [file srep25792-s1.pdf]

**Association between systemic oxidative stress and visual field damage in open-angle  
glaucoma**

**Masaki Tanito<sup>1,2</sup>, Sachiko Kaidzu<sup>1</sup>, Yasuyuki Takai<sup>1</sup> & Akihiro Ohira<sup>1</sup>**

<sup>1</sup>Department of Ophthalmology, Shimane University Faculty of Medicine, 89-1 Enya, Izumo, Shimane, 693-8501, Japan. <sup>2</sup>Division of Ophthalmology, Matsue Red Cross Hospital, 200 Horo-machi, Matsue, Shimane, 690-8506, Japan.

Table S1 Dataset

| Study ID | Age | Sex | Type | Last |     |     |       |          |         |      | Highest |     |     |      |      |       |
|----------|-----|-----|------|------|-----|-----|-------|----------|---------|------|---------|-----|-----|------|------|-------|
|          |     |     |      | meal | SBP | DBP | Pulse | Diabetes | Smoking | dROM | BAP     | SH  | IOP | Meds | IOP  | MD    |
| 4        | 72  | M   | POAG | 5    | 159 | 91  | 94    | y        | y       | 462  | 1522    | 577 | 19  | 1    | 20   | -29.1 |
| 9        | 67  | F   | POAG | 2    | 128 | 79  | 58    | n        | n       | 431  | 1737    | 582 | 13  | 1    | 17   | -22.4 |
| 11       | 74  | M   | POAG | 2    | 174 | 94  | 75    | n        | n       | 261  | 1799    | 626 | 11  | 1    | 18   | -13.7 |
| 12       | 79  | F   | POAG | 2    | 141 | 65  | 81    | y        | n       | 304  | 2008    | 601 | 20  | 1    | 24   | -6.01 |
| 15       | 65  | M   | POAG | 4.5  | 211 | 133 | 92    | n        | n       | 309  | 1821    | 553 | 42  | 1    | 42   | -30   |
| 18       | 50  | F   | POAG | 2.5  | 140 | 87  | 73    | n        | n       | 274  | 2122    | 564 | 11  | 0    | 14   | 0.87  |
| 20       | 73  | F   | POAG | 2    | 172 | 93  | 94    | n        | n       | 474  | 1724    | 636 | 15  | 1    | 15   | -20.1 |
| 22       | 42  | F   | POAG | 2    | 102 | 60  | 67    | n        | n       | 336  | 1828    | 630 | 23  | 0    | 23   | -8.77 |
| 24       | 61  | F   | NTG  | 3.5  | 121 | 71  | 94    | n        | n       | 281  | 1547    | 708 | 13  | 2    | 14   | -13   |
| 25       | 38  | F   | POAG | 4    | 138 | 84  | 83    | n        | n       | 290  | 1904    | 692 | 13  | 2    | 21   | -17.4 |
| 27       | 61  | M   | POAG | 6.5  | 139 | 79  | 64    | y        | y       | 381  | 1928    | 620 | 52  | 3    | 52   | -25   |
| 28       | 87  | M   | POAG | 2    | 164 | 81  | 81    | n        | n       | 308  | 2029    | 551 | 16  | 0    | 16   | -30   |
| 29       | 71  | M   | POAG | 1    | 105 | 56  | 73    | y        | n       | 272  | 1453    | 681 | 13  | 3    | 34   | -30.4 |
| 30       | 82  | M   | POAG | 2.5  | 167 | 96  | 100   | n        | n       | 412  | 1994    | 724 | 15  | 1    | 28   | -24.2 |
| 31       | 60  | M   | POAG | 13   | 138 | 92  | 67    | n        | n       | 314  | 2013    | 807 | 19  | 0    | 22   | -1.7  |
| 34       | 42  | F   | NTG  | 4.5  | 109 | 71  | 84    | n        | n       | 255  | 1926    | 726 | 13  | 1    | 14   | 0.83  |
| 35       | 70  | M   | POAG | 5    | 123 | 73  | 91    | y        | y       | 327  | 1655    | 551 | 16  | 0    | 21.6 | -23.7 |
| 44       | 70  | M   | NTG  | 4.5  | 125 | 71  | 71    | y        | n       | 296  | 1892    | 675 | 16  | 3    | 16   | -20.7 |
| 45       | 73  | M   | NTG  | 6    | 182 | 99  | 56    | n        | n       | 528  | 1262    | 606 | 16  | 3    | 19   | -17.8 |
| 50       | 58  | M   | POAG | 5    | 147 | 99  | 85    | y        | y       | 282  | 2038    | 777 | 37  | 3    | 37   | -11.4 |
| 58       | 44  | F   | POAG | 4    | 105 | 63  | 64    | n        | n       | 378  | 2186    | 686 | 13  | 2    | 22   | -22.9 |
| 68       | 72  | F   | POAG | 3    | 121 | 71  | 68    | y        | n       | 337  | 2303    | 847 | 12  | 1    | 19   | -26.8 |
| 72       | 74  | F   | POAG | 6    | 130 | 86  | 57    | n        | n       | 331  | 2075    | 648 | 15  | 2    | 30   | -9.6  |
| 75       | 83  | F   | NTG  | 3.5  | 142 | 85  | 85    | n        | n       | 309  | 2189    | 572 | 13  | 1    | 20   | -16.6 |
| 76       | 61  | M   | POAG | 3    | 148 | 92  | 63    | y        | n       | 378  | 1649    | 396 | 47  | 2    | 50   | -30   |
| 77       | 65  | M   | POAG | 3    | 138 | 72  | 81    | n        | y       | 387  | 2024    | 474 | 23  | 1    | 26   | -18.3 |
| 78       | 60  | M   | POAG | 5    | 140 | 73  | 91    | y        | n       | 406  | 1871    | 476 | 20  | 1    | 29   | -8.36 |
| 79       | 58  | F   | POAG | 2    | 97  | 61  | 99    | n        | n       | 384  | 1927    | 396 | 18  | 3    | 21   | -8.88 |
| 80       | 49  | M   | POAG | 3    | 140 | 94  | 87    | n        | n       | 278  | 1556    | 580 | 18  | 3    | 28   | -14.2 |
| 81       | 63  | F   | POAG | 3    | 182 | 98  | 128   | n        | n       | 370  | 2028    | 556 | 26  | 3    | 39   | -5.02 |
| 84       | 61  | M   | POAG | 3    | 110 | 64  | 60    | n        | y       | 358  | 2196    | 580 | 26  | 2    | 52   | -25   |
| 86       | 64  | F   | NTG  | 5    | 137 | 91  | 102   | n        | n       | 347  | 2071    | 589 | 12  | 1    | 13   | -10.6 |
| 88       | 74  | M   | POAG | 3    | 125 | 64  | 80    | n        | n       | 318  | 1968    | 523 | 15  | 1    | 18   | -13.3 |
| 90       | 58  | M   | POAG | 4    | 142 | 85  | 68    | n        | n       | 386  | 1972    | 766 | 12  | 3    | 20   | -25.5 |
| 91       | 73  | M   | POAG | 4    | 191 | 110 | 74    | n        | n       | 299  | 2113    | 727 | 15  | 2    | 30   | -14   |
| 93       | 65  | F   | POAG | 2.5  | 124 | 80  | 90    | n        | n       | 450  | 2078    | 692 | 17  | 1    | 28   | -0.36 |
| 97       | 81  | M   | POAG | 6    | 138 | 96  | 72    | n        | y       | 359  | 2150    | 615 | 21  | 1    | 24   | -23.2 |
| 98       | 57  | M   | POAG | 3    | 131 | 82  | 70    | n        | n       | 380  | 1459    | 606 | 19  | 3    | 25   | -10.4 |
| 100      | 78  | M   | POAG | 4    | 146 | 81  | 131   | y        | n       | 329  | 1878    | 439 | 22  | 0    | 23   | -1.73 |
| 101      | 74  | F   | POAG | 2.5  | 146 | 58  | 79    | n        | n       | 265  | 2061    | 579 | 15  | 1    | 27   | -2.66 |
| 103      | 80  | F   | POAG | 2.5  | 129 | 77  | 83    | n        | n       | 362  | 1980    | 678 | 15  | 2    | 27   | -14.6 |
| 108      | 78  | M   | NTG  | 8    | 134 | 70  | 108   | n        | n       | 258  | 2354    | 463 | 14  | 0    | 14   | -2.71 |
| 110      | 63  | M   | POAG | 3.5  | 130 | 67  | 63    | y        | y       | 318  | 2130    | 725 | 22  | 2    | 22   | -2.89 |
| 111      | 64  | F   | NTG  | 3.5  | 126 | 75  | 82    | n        | n       | 402  | 1852    | 753 | 13  | 0    | 13   | -4.31 |
| 112      | 73  | F   | POAG | 2    | 145 | 63  | 73    | n        | n       | 239  | 2143    | 629 | 12  | 1    | 14   | -18.3 |
| 114      | 58  | F   | POAG | 3    | 130 | 88  | 70    | n        | n       | 379  | 2149    | 657 | 16  | 2    | 20   | -6.89 |
| 116      | 74  | F   | POAG | 2.5  | 150 | 78  | 78    | y        | n       | 280  | 2398    | 633 | 12  | 0    | 18   | -5.73 |
| 117      | 76  | F   | POAG | 3    | 138 | 87  | 66    | n        | n       | 337  | 2129    | 613 | 17  | 3    | 17   | -28.8 |
| 120      | 54  | M   | NTG  | 4.5  | 137 | 83  | 83    | n        | y       | 370  | 1975    | 665 | 16  | 3    | 17   | -11.7 |
| 122      | 54  | M   | NTG  | 3.5  | 137 | 77  | 73    | n        | y       | 280  | 1618    | 642 | 12  | 0    | 17   | -7.47 |
| 123      | 76  | F   | NTG  | 3    | 108 | 60  | 69    | n        | n       | 314  | 1758    | 588 | 18  | 1    | 18   | -27.7 |
| 124      | 82  | F   | NTG  | 5    | 167 | 87  | 85    | n        | n       | 440  | 1775    | 559 | 13  | 0    | 13   | -7.84 |
| 126      | 82  | F   | POAG | 3.5  | 187 | 93  | 114   | n        | n       | 282  | 1660    | 635 | 13  | 1    | 15   | -7.44 |
| 128      | 63  | M   | POAG | 5    | 136 | 95  | 65    | n        | n       | 370  | 1694    | 618 | 14  | 2    | 20   | -19.5 |
| 129      | 68  | M   | POAG | 19   | 157 | 92  | 79    | n        | n       | 338  | 1979    | 619 | 12  | 0    | 21   | -30   |
| 131      | 24  | M   | POAG | 4.5  | 162 | 79  | 88    | y        | y       | 330  | 1608    | 615 | 27  | 0    | 27   | -0.95 |
| 132      | 82  | F   | POAG | 1.5  | 142 | 63  | 94    | y        | n       | 356  | 2121    | 421 | 17  | 1    | 24   | -27.4 |
| 136      | 88  | M   | POAG | 2    | 132 | 75  | 56    | n        | n       | 432  | 2318    | 599 | 12  | 2    | 17   | -23.5 |
| 137      | 75  | F   | NTG  | 3.5  | 169 | 91  | 87    | n        | n       | 412  | 2242    | 593 | 16  | 1    | 16   | -14.1 |
| 138      | 77  | M   | POAG | 4    | 122 | 60  | 96    | y        | y       | 348  | 2007    | 628 | 14  | 2    | 29   | -30   |
| 139      | 71  | F   | POAG | 5    | 202 | 85  | 68    | n        | n       | 353  | 2146    | 598 | 13  | 2    | 13   | -29.2 |
| 140      | 83  | M   | POAG | 4    | 153 | 89  | 105   | n        | n       | 401  | 1508    | 328 | 11  | 2    | 35   | -15.1 |
| 141      | 57  | M   | POAG | 6    | 131 | 81  | 75    | n        | n       | 376  | 1155    | 586 | 14  | 2    | 27   | -3.95 |
| 142      | 77  | M   | POAG | 4    | 117 | 80  | 84    | n        | y       | 435  | 1912    | 516 | 10  | 0    | 18   | -21.6 |
| 147      | 82  | F   | NTG  | 3    | 107 | 74  | 112   | n        | n       | 359  | 2075    | 500 | 16  | 0    | 43   | -25.8 |
| 153      | 65  | M   | POAG | 2    | 143 | 83  | 73    | y        | y       | 311  | 2135    | 594 | 23  | 3    | 33   | -19.7 |
| 156      | 71  | M   | POAG | 5    | 134 | 69  | 68    | y        | n       | 322  | 1803    | 574 | 14  | 3    | 26   | -18   |

|     |    |   |      |     |     |    |     |   |   |     |      |     |    |   |      |       |
|-----|----|---|------|-----|-----|----|-----|---|---|-----|------|-----|----|---|------|-------|
| 157 | 77 | M | POAG | 5   | 118 | 78 | 83  | n | n | 219 | 1963 | 598 | 13 | 2 | 15   | -30   |
| 158 | 68 | F | POAG | 6   | 120 | 78 | 78  | n | n | 363 | 2308 | 646 | 13 | 1 | 14   | -2.98 |
| 159 | 69 | M | POAG | 4.5 | 152 | 72 | 88  | n | n | 356 | 2168 | 676 | 14 | 1 | 21   | -15.3 |
| 160 | 89 | F | NTG  | 5.5 | 122 | 80 | 104 | n | n | 390 | 1895 | 537 | 12 | 0 | 20   | -29.4 |
| 161 | 25 | F | NTG  | 5   | 117 | 63 | 62  | n | n | 555 | 2289 | 638 | 15 | 0 | 18   | -8.94 |
| 162 | 71 | M | NTG  | 5   | 144 | 77 | 72  | n | n | 329 | 1299 | 549 | 11 | 2 | 17   | -12.9 |
| 166 | 58 | M | NTG  | 3.5 | 128 | 81 | 73  | n | n | 243 | 2142 | 678 | 10 | 1 | 15   | -1.55 |
| 167 | 75 | F | POAG | 6   | 163 | 87 | 58  | y | n | 439 | 1812 | 567 | 17 | 3 | 29   | -17.6 |
| 168 | 58 | F | POAG | 5.5 | 89  | 62 | 82  | n | n | 445 | 1960 | 542 | 18 | 3 | 21   | -8.88 |
| 170 | 68 | M | POAG | 4   | 132 | 68 | 98  | y | y | 285 | 1841 | 736 | 16 | 2 | 20   | -12.3 |
| 171 | 67 | M | POAG | 4   | 126 | 76 | 80  | n | n | 387 | 1631 | 507 | 14 | 1 | 22   | -14.1 |
| 176 | 58 | F | POAG | 3.5 | 126 | 71 | 79  | n | n | 325 | 2131 | 668 | 20 | 3 | 25   | -23.7 |
| 177 | 62 | F | NTG  | 7   | 121 | 75 | 83  | n | n | 423 | 2138 | 706 | 9  | 2 | 14   | -19.9 |
| 178 | 57 | M | POAG | 2.5 | 120 | 89 | 91  | y | n | 346 | 1905 | 733 | 13 | 1 | 23   | -6.35 |
| 180 | 60 | M | POAG | 2.5 | 153 | 94 | 96  | n | n | 383 | 1894 | 608 | 20 | 1 | 29   | -11.2 |
| 182 | 81 | F | NTG  | 2.5 | 175 | 66 | 76  | n | n | 382 | 2094 | 707 | 13 | 0 | 18   | -2.41 |
| 184 | 71 | F | POAG | 4   | 122 | 77 | 75  | n | n | 409 | 2163 | 595 | 10 | 1 | 28   | -25.8 |
| 186 | 68 | M | NTG  | 8   | 178 | 70 | 68  | n | n | 282 | 2396 | 517 | 13 | 2 | 16   | -11.6 |
| 188 | 84 | M | POAG | 3   | 128 | 70 | 68  | n | n | 330 | 1518 | 615 | 11 | 1 | 20   | -26.7 |
| 189 | 74 | F | NTG  | 1.5 | 146 | 82 | 86  | n | n | 362 | 1711 | 757 | 23 | 0 | 23   | -3.81 |
| 193 | 73 | F | NTG  | 3   | 126 | 62 | 58  | n | n | 277 | 1676 | 816 | 13 | 0 | 14   | 1.18  |
| 194 | 59 | F | POAG | 3.5 | 156 | 90 | 42  | n | n | 450 | 1551 | 760 | 12 | 2 | 16   | -31.1 |
| 196 | 59 | F | NTG  | 6   | 152 | 80 | 76  | y | n | 403 | 1489 | 864 | 12 | 3 | 16   | -28.3 |
| 202 | 66 | F | POAG | 2.5 | 129 | 70 | 59  | n | n | 299 | 2001 | 794 | 17 | 2 | 24   | -1.81 |
| 203 | 61 | F | POAG | 2   | 149 | 70 | 78  | y | n | 366 | 1786 | 707 | 17 | 1 | 22   | -1.06 |
| 207 | 80 | F | NTG  | 2.5 | 150 | 84 | 84  | n | n | 377 | 2103 | 543 | 15 | 0 | 15   | -0.63 |
| 208 | 84 | F | NTG  | 2.5 | 133 | 70 | 66  | y | n | 491 | 2425 | 473 | 15 | 1 | 18   | -3.29 |
| 210 | 83 | F | POAG | 3   | 116 | 72 | 67  | n | n | 413 | 2063 | 525 | 15 | 1 | 20   | 0.87  |
| 213 | 78 | M | NTG  | 3   | 140 | 74 | 75  | y | n | 337 | 1625 | 458 | 14 | 1 | 16   | -0.46 |
| 214 | 67 | F | POAG | 3   | 130 | 63 | 66  | n | n | 315 | 1945 | 538 | 20 | 1 | 24   | -1.51 |
| 215 | 73 | F | POAG | 3   | 179 | 80 | 53  | y | n | 319 | 2100 | 417 | 23 | 2 | 27   | -4.1  |
| 217 | 83 | M | NTG  | 1.5 | 124 | 47 | 101 | y | n | 485 | 1885 | 628 | 16 | 0 | 21   | -3.85 |
| 221 | 72 | M | POAG | 5   | 152 | 99 | 79  | y | n | 320 | 1959 | 731 | 14 | 3 | 19   | -2.88 |
| 222 | 71 | M | NTG  | 3.5 | 147 | 88 | 100 | n | n | 266 | 1843 | 741 | 11 | 1 | 16   | -6.39 |
| 223 | 76 | F | NTG  | 3.5 | 129 | 57 | 81  | n | n | 366 | 2286 | 591 | 13 | 1 | 24.1 | -7.75 |
| 227 | 61 | F | NTG  | 3   | 138 | 88 | 64  | n | n | 453 | 1747 | 678 | 19 | 1 | 19   | -0.9  |
| 231 | 79 | M | NTG  | 2.5 | 147 | 76 | 59  | n | n | 380 | 2286 | 710 | 20 | 2 | 58   | -29.1 |
| 234 | 76 | F | NTG  | 4   | 145 | 62 | 61  | n | n | 338 | 2105 | 680 | 13 | 1 | 17   | 2.13  |
| 235 | 78 | M | NTG  | 2.5 | 159 | 77 | 72  | n | n | 392 | 2505 | 646 | 11 | 1 | 16   | -4.23 |
| 236 | 75 | F | NTG  | 4   | 158 | 82 | 91  | n | n | 346 | 2234 | 726 | 19 | 1 | 19   | 1.12  |
| 239 | 58 | M | NTG  | 4   | 150 | 88 | 62  | n | n | 282 | 1939 | 884 | 7  | 2 | 20   | -15.5 |
| 242 | 72 | F | POAG | 2   | 144 | 69 | 80  | n | n | 308 | 2078 | 567 | 23 | 1 | 25   | -4.1  |
| 246 | 77 | F | NTG  | 2.5 | 159 | 48 | 79  | n | n | 464 | 2120 | 588 | 17 | 2 | 22   | -8.16 |
| 248 | 68 | F | POAG | 3.5 | 140 | 75 | 67  | n | n | 473 | 2042 | 577 | 10 | 1 | 21   | 1.67  |
| 251 | 74 | M | NTG  | 2   | 105 | 59 | 55  | y | n | 403 | 1944 | 331 | 14 | 0 | 14   | 0.57  |
| 252 | 79 | F | NTG  | 2.5 | 148 | 77 | 58  | n | n | 380 | 1909 | 628 | 16 | 1 | 17   | 0.01  |
| 256 | 61 | M | POAG | 3   | 132 | 52 | 52  | n | n | 399 | 1685 | 598 | 13 | 2 | 40   | -8.14 |
| 258 | 69 | M | NTG  | 5.5 | 155 | 93 | 70  | n | n | 304 | 1297 | 820 | 12 | 2 | 18   | -25.6 |
| 262 | 82 | F | NTG  | 3   | 140 | 75 | 83  | n | n | 361 | 2080 | 544 | 12 | 1 | 19   | -2.36 |
| 263 | 77 | F | NTG  | 1.5 | 132 | 81 | 74  | n | n | 318 | 2121 | 551 | 12 | 2 | 17   | -14.9 |
| 264 | 69 | F | POAG | 2.5 | 120 | 61 | 68  | n | n | 328 | 1985 | 660 | 15 | 2 | 27   | -2.89 |
| 267 | 85 | F | NTG  | 3   | 158 | 76 | 58  | n | n | 350 | 1925 | 527 | 16 | 1 | 20   | -3.43 |
| 269 | 67 | M | NTG  | 2.5 | 176 | 93 | 80  | y | y | 343 | 1945 | 513 | 10 | 0 | 15   | 2.62  |
| 270 | 85 | F | POAG | 3   | 132 | 65 | 62  | n | n | 415 | 1709 | 578 | 15 | 1 | 25   | -5.24 |
| 276 | 83 | F | NTG  | 3   | 154 | 81 | 67  | n | n | 313 | 1916 | 590 | 15 | 1 | 18   | -0.79 |
| 287 | 78 | F | NTG  | 4   | 141 | 80 | 79  | n | n | 365 | 2040 | 542 | 15 | 0 | 16   | -2.68 |
| 289 | 88 | M | NTG  | 3.5 | 123 | 69 | 73  | y | n | 260 | 2071 | 470 | 8  | 1 | 12   | -7.68 |
| 291 | 53 | M | POAG | 12  | 126 | 78 | 69  | y | y | 488 | 2194 | 671 | 26 | 3 | 36   | -11.2 |
| 292 | 79 | M | POAG | 5   | 120 | 68 | 91  | y | n | 346 | 2003 | 589 | 22 | 1 | 23   | -1.73 |
| 298 | 78 | F | POAG | 4   | 132 | 65 | 61  | n | n | 368 | 1821 | 554 | 11 | 1 | 20   | -13.5 |
| 299 | 73 | F | NTG  | 3.5 | 135 | 57 | 54  | y | n | 430 | 1919 | 564 | 14 | 0 | 19   | -0.3  |
| 301 | 77 | F | NTG  | 3   | 105 | 67 | 70  | y | n | 303 | 1733 | 490 | 14 | 1 | 17   | -0.34 |
| 302 | 55 | M | NTG  | 4   | 123 | 80 | 84  | n | n | 435 | 2038 | 677 | 14 | 1 | 19   | -8.48 |
| 307 | 84 | F | POAG | 2.5 | 158 | 77 | 82  | n | n | 270 | 2143 | 624 | 25 | 1 | 25   | -5.65 |
| 308 | 77 | M | POAG | 4.5 | 116 | 79 | 82  | n | y | 448 | 2017 | 792 | 9  | 0 | 18   | -21.6 |
| 310 | 62 | M | POAG | 3.5 | 140 | 79 | 67  | n | n | 328 | 2094 | 753 | 17 | 3 | 20   | -2.06 |
| 311 | 60 | M | POAG | 4.5 | 130 | 87 | 85  | y | n | 258 | 1959 | 629 | 24 | 3 | 42   | -30.5 |
| 312 | 83 | F | POAG | 3   | 114 | 51 | 79  | n | n | 305 | 1682 | 786 | 15 | 1 | 19   | -5.34 |
| 313 | 83 | F | POAG | 3   | 134 | 81 | 87  | n | n | 522 | 1975 | 812 | 12 | 1 | 19   | -3.55 |
| 314 | 81 | M | NTG  | 2   | 146 | 58 | 51  | n | n | 311 | 2514 | 693 | 11 | 1 | 17   | 0.06  |
| 318 | 64 | M | NTG  | 2.5 | 138 | 76 | 75  | n | n | 251 | 2339 | 697 | 11 | 1 | 16   | -3.05 |

|     |    |   |      |     |     |     |     |   |   |     |      |     |    |   |    |       |
|-----|----|---|------|-----|-----|-----|-----|---|---|-----|------|-----|----|---|----|-------|
| 320 | 77 | F | POAG | 3   | 128 | 70  | 74  | n | n | 380 | 2163 | 738 | 11 | 1 | 21 | -0.17 |
| 330 | 53 | F | POAG | 3   | 155 | 96  | 76  | n | n | 438 | 2040 | 806 | 5  | 0 | 56 | -7.53 |
| 331 | 80 | M | POAG | 2.5 | 132 | 62  | 71  | y | n | 365 | 1511 | 693 | 13 | 2 | 18 | -17.3 |
| 332 | 57 | M | POAG | 4   | 154 | 78  | 61  | n | n | 313 | 1968 | 748 | 13 | 3 | 23 | -31.5 |
| 335 | 61 | F | NTG  | 3   | 111 | 69  | 73  | n | n | 354 | 1892 | 734 | 13 | 0 | 15 | -1.14 |
| 349 | 84 | F | NTG  | 2   | 124 | 63  | 76  | n | n | 306 | 2021 | 662 | 11 | 0 | 15 | -3.11 |
| 350 | 85 | M | POAG | 2.5 | 119 | 57  | 72  | n | n | 421 | 1925 | 521 | 15 | 1 | 27 | 0.78  |
| 358 | 83 | F | POAG | 2   | 121 | 65  | 88  | n | n | 368 | 1709 | 572 | 13 | 1 | 42 | -23   |
| 361 | 80 | F | POAG | 2   | 136 | 60  | 88  | y | n | 313 | 1864 | 633 | 20 | 1 | 25 | -0.38 |
| 363 | 83 | F | POAG | 4.5 | 154 | 82  | 64  | n | n | 465 | 2017 | 496 | 16 | 1 | 24 | 1.9   |
| 364 | 80 | M | POAG | 2   | 168 | 72  | 58  | n | n | 400 | 1517 | 430 | 15 | 1 | 36 | 0.12  |
| 367 | 80 | F | POAG | 2.5 | 149 | 73  | 59  | n | n | 332 | 2723 | 652 | 11 | 2 | 14 | -5.64 |
| 369 | 70 | F | NTG  | 3.5 | 135 | 75  | 58  | n | n | 360 | 2857 | 646 | 11 | 1 | 19 | -2.91 |
| 373 | 79 | F | NTG  | 4   | 151 | 89  | 114 | n | n | 436 | 2056 | 565 | 13 | 1 | 17 | -1.93 |
| 375 | 76 | F | NTG  | 3.5 | 134 | 83  | 55  | n | n | 271 | 2162 | 607 | 11 | 1 | 18 | -0.52 |
| 378 | 78 | M | NTG  | 5   | 143 | 83  | 69  | n | n | 326 | 2359 | 366 | 15 | 1 | 17 | -0.45 |
| 380 | 54 | M | NTG  | 6   | 106 | 60  | 65  | n | y | 303 | 1655 | 750 | 15 | 3 | 18 | -28.9 |
| 383 | 80 | M | NTG  | 2   | 150 | 65  | 62  | n | n | 204 | 1833 | 660 | 9  | 0 | 11 | -1.39 |
| 389 | 66 | F | NTG  | 2.5 | 111 | 60  | 78  | n | n | 230 | 2071 | 680 | 13 | 0 | 16 | -2.06 |
| 397 | 75 | F | NTG  | 3.5 | 129 | 63  | 59  | n | n | 374 | 1568 | 485 | 16 | 0 | 17 | -2.17 |
| 399 | 82 | F | NTG  | 3.5 | 134 | 71  | 78  | n | y | 262 | 2197 | 523 | 13 | 1 | 19 | 0.68  |
| 400 | 68 | M | NTG  | 4   | 127 | 72  | 57  | n | n | 334 | 1967 | 534 | 12 | 2 | 18 | -4.46 |
| 401 | 75 | F | NTG  | 3.5 | 172 | 85  | 72  | n | n | 379 | 1242 | 674 | 11 | 1 | 17 | -7.38 |
| 402 | 79 | F | NTG  | 5.5 | 158 | 70  | 64  | n | n | 387 | 2043 | 516 | 11 | 1 | 17 | -13.9 |
| 404 | 79 | F | NTG  | 5.5 | 151 | 91  | 81  | n | n | 408 | 1955 | 599 | 13 | 1 | 14 | -12.1 |
| 405 | 49 | F | POAG | 4   | 160 | 102 | 89  | n | n | 314 | 2013 | 663 | 18 | 1 | 25 | -18.1 |
| 406 | 85 | M | POAG | 3   | 119 | 60  | 63  | n | n | 286 | 1414 | 499 | 11 | 1 | 20 | -26.7 |
| 407 | 81 | M | NTG  | 5   | 142 | 82  | 77  | n | n | 312 | 2021 | 574 | 16 | 3 | 16 | -7.44 |
| 414 | 71 | F | NTG  | 3.5 | 90  | 53  | 62  | n | n | 346 | 2123 | 551 | 12 | 0 | 12 | -0.71 |
| 416 | 71 | F | NTG  | 4.5 | 121 | 64  | 55  | n | n | 340 | 1792 | 587 | 12 | 1 | 17 | -6.67 |
| 420 | 75 | F | NTG  | 3   | 162 | 80  | 58  | y | n | 322 | 2009 | 623 | 12 | 1 | 14 | -5.1  |
| 425 | 80 | F | NTG  | 3.5 | 181 | 66  | 66  | n | n | 309 | 1911 | 558 | 14 | 1 | 16 | -1.83 |
| 430 | 63 | M | NTG  | 3.5 | 180 | 100 | 78  | y | n | 453 | 2213 | 605 | 13 | 0 | 13 | -0.08 |
| 431 | 55 | F | POAG | 3.5 | 123 | 80  | 72  | n | n | 461 | 2057 | 624 | 12 | 1 | 22 | -12.3 |
| 432 | 70 | F | POAG | 4   | 145 | 80  | 71  | n | n | 358 | 2032 | 609 | 21 | 0 | 21 | -0.53 |
| 433 | 81 | M | POAG | 4   | 159 | 67  | 59  | n | n | 343 | 1321 | 611 | 12 | 2 | 21 | -24.7 |
| 437 | 71 | M | NTG  | 2.5 | 133 | 71  | 88  | y | n | 300 | 1978 | 575 | 16 | 0 | 17 | -2.77 |
| 439 | 81 | M | NTG  | 2.5 | 134 | 73  | 73  | y | n | 335 | 2224 | 600 | 17 | 2 | 21 | 0.52  |
| 441 | 84 | F | NTG  | 3.5 | 167 | 97  | 79  | n | n | 385 | 2229 | 562 | 10 | 1 | 16 | -5.1  |
| 443 | 82 | M | NTG  | 3.5 | 130 | 65  | 58  | n | n | 393 | 2114 | 708 | 12 | 0 | 14 | -0.22 |
| 445 | 87 | M | NTG  | 4   | 146 | 55  | 55  | n | n | 380 | 1473 | 619 | 17 | 0 | 17 | -0.61 |
| 450 | 67 | M | POAG | 3.5 | 123 | 78  | 77  | y | n | 393 | 2048 | 764 | 17 | 1 | 27 | 0.23  |
| 452 | 78 | F | POAG | 3   | 132 | 81  | 78  | y | n | 416 | 1960 | 570 | 17 | 1 | 23 | 0.86  |
| 460 | 73 | F | NTG  | 3   | 142 | 72  | 68  | n | n | 413 | 1943 | 545 | 11 | 0 | 13 | -0.8  |
| 464 | 65 | F | POAG | 3.5 | 165 | 83  | 52  | n | n | 469 | 2259 | 612 | 19 | 1 | 27 | -2.71 |
| 469 | 83 | M | NTG  | 3   | 162 | 70  | 51  | n | n | 374 | 2031 | 580 | 11 | 1 | 17 | -2.35 |
| 476 | 67 | F | POAG | 4.5 | 137 | 69  | 66  | n | n | 369 | 1540 | 523 | 16 | 1 | 25 | -7.7  |
| 477 | 73 | M | NTG  | 4   | 125 | 64  | 71  | n | n | 325 | 1999 | 509 | 13 | 2 | 18 | -9.76 |
| 478 | 73 | F | POAG | 2   | 139 | 83  | 80  | n | n | 341 | 1742 | 591 | 17 | 0 | 22 | -1.66 |
| 484 | 62 | F | NTG  | 6   | 124 | 64  | 80  | n | n | 305 | 2140 | 646 | 14 | 0 | 14 | -5.01 |
| 493 | 64 | M | NTG  | 3   | 147 | 89  | 61  | n | y | 351 | 2528 | 657 | 13 | 2 | 13 | -15.9 |
| 498 | 56 | M | POAG | 2.5 | 133 | 90  | 86  | n | y | 420 | 1992 | 550 | 15 | 2 | 26 | -19.8 |
| 501 | 77 | F | NTG  | 3.5 | 153 | 70  | 54  | n | n | 362 | 2144 | 548 | 6  | 1 | 10 | -7.51 |
| 502 | 57 | M | NTG  | 4.5 | 144 | 81  | 53  | n | y | 353 | 1571 | 602 | 14 | 1 | 16 | -1.44 |
| 505 | 48 | F | POAG | 3.5 | 147 | 98  | 89  | n | n | 296 | 2153 | 618 | 19 | 1 | 23 | -2.83 |
| 506 | 84 | M | NTG  | 5   | 140 | 76  | 66  | n | n | 397 | 2665 | 526 | 11 | 0 | 13 | -1.34 |
| 507 | 79 | F | NTG  | 3   | 149 | 70  | 74  | n | n | 267 | 2030 | 630 | 11 | 1 | 12 | -2.65 |
| 510 | 61 | F | NTG  | 2.5 | 120 | 71  | 76  | n | n | 298 | 1651 | 616 | 18 | 0 | 18 | -0.74 |
| 516 | 71 | F | NTG  | 3   | 136 | 70  | 88  | y | n | 354 | 2301 | 644 | 13 | 1 | 23 | 1.08  |
| 518 | 76 | M | POAG | 15  | 139 | 71  | 75  | y | n | 315 | 2316 | 607 | 14 | 1 | 26 | -10.4 |
| 521 | 75 | F | POAG | 4   | 128 | 89  | 67  | n | n | 402 | 1972 | 526 | 34 | 3 | 40 | -29.2 |
| 526 | 74 | F | POAG | 5   | 146 | 73  | 63  | n | n | 387 | 1693 | 496 | 11 | 2 | 18 | -7.46 |
| 528 | 76 | M | POAG | 6.5 | 144 | 79  | 73  | n | n | 352 | 1343 | 538 | 13 | 3 | 25 | -29.1 |
| 531 | 82 | F | POAG | 6.5 | 135 | 83  | 89  | n | n | 281 | 2141 | 489 | 13 | 1 | 21 | -24.1 |
